# Exploring Integrative Analysis using the BioMedical Evidence Graph

Adam Struck<sup>1</sup>, Brian Walsh<sup>1</sup>, Alexander Buchanan<sup>1</sup>, Jordan A. Lee<sup>1</sup>, Ryan Spangler<sup>1</sup>, Josh Stuart<sup>2</sup>, Kyle Ellrott<sup>1</sup>

<sup>1</sup> Biomedical Engineering; Oregon Health and Science University; Portland OR 97239, USA

<sup>2</sup> University of California, Santa Cruz

Corresponding Author: Kyle Ellrott

## Highlights

- Data resource connected extremely diverse set of cancer data sets
- Graph query engine that can be easily deployed and used on new datasets
- Easily installed python client
- Server online at [bmeg.io](http://bmeg.io)

## Abstract

The analysis of cancer biology data involves extremely heterogeneous datasets including information from RNA sequencing, genome-wide copy number, DNA methylation data reporting on epigenomic regulation, somatic mutations from whole-exome or whole-genome analyses, pathology estimates from imaging sections or subtyping, drug response or other treatment outcomes, and various other clinical and phenotypic measurements. Bringing these different resources into a common framework, with a data model that allows for complex relationships as well as dense vectors of features, will unlock integrative analysis. We introduce a graph database and query engine for discovery and analysis of cancer biology, called the BioMedical Evidence Graph (BMEG). The BMEG is unique from other biological data graphs in that sample level molecular information is connected to reference knowledge bases. It combines gene expression and mutation data, with drug response experiments, pathway information databases and literature derived associations. The construction of the BMEG has resulted in a graph containing over 36M vertices and 29M edges. The BMEG system provides a graph query based API to enable analysis, with client code available for Python, Javascript and R, and a server online at [bmeg.io](http://bmeg.io). Using this system we have developed several forms of integrated analysis to demonstrate the utility of the system. The BMEG is an evolving resource dedicated to enabling integrative analysis. We have demonstrated queries on the system that illustrate mutation significance analysis, drug response machine learning, patient level knowledge base queries and pathway level analysis. We have compared the resulting graph to other available integrated graph systems, and demonstrated that it is unique in the scale of the graph and the type of data it makes available.

## Summary

The analysis of cancer biology data involves extremely heterogeneous datasets including information. Bringing these different resources into a common framework, with a data model that allows for complex relationships as well as dense vectors of features, will unlock integrative analysis. We introduce a graph database and query engine for discovery and analysis of cancer biology, called the BioMedical Evidence Graph (BMEG). The construction of the BMEG has resulted in a graph containing over 36M vertices and 29M edges. The BMEG system provides a graph query based API

to enable analysis, with client code available for Python, Javascript and R, and a server online at [bmeg.io](http://bmeg.io). Using this system we have developed several forms of integrated analysis to demonstrate the utility of the system.

## Key Words

Cancer, Graph Database, API, Query Engine, Data Integration, Drug Response, Knowledge Base

## Introduction

Biological data produced by large-scale projects now routinely reaches petabyte levels thanks to major advances in sequencing and imaging. This exponential growth in size is well-documented and is being addressed by multiple big-data initiatives. However, the parallel increase in data heterogeneity is still a major unaddressed issue. With multiple profiling methods, platforms, versions, formats and pipelines, biological data is far from monolithic. The immense and expansive amount of heterogeneous data make it difficult to normalize and integrate data as well as perform integrative analysis across disparate experiments. When faced with these challenges as well as the substantial labor and computation costs, researchers may use only a fraction of publicly available data for their analysis, and will not update their data or analysis as new data becomes available.

Graph databases are useful tools for systems biology analysis where integration of complex data is required<sup>1-3</sup>. In the commercial sector, several major data aggregators have been successfully using graph databases for integration of heterogeneous data. Facebook uses the 'Social Graph'<sup>4</sup> to represent the connections between people and their information, while Google's search engine uses a 'Knowledge Graph' to connect various facts about different subjects. This approach is especially powerful when entities in the graph are connected via multiple types of complex, chained interactions. Based on these observations, we have built the BioMedical Evidence Graph (BMEG) to allow for complex integration and analysis of heterogeneous biological data.

The BMEG was created by importing several cancer related resources and transforming them into a coherent graph representation. These resources include patient and sample information, mutations, gene expression, drug response data, genomic annotations and literature based analysis (see [Table 1](#)). This Graph contains 15K patients, 54K samples, 4M alleles, 640K drug response experiments and 50K literature derived genotype to phenotype associations.

To enable analysis and machine learning, our team concentrated on utilizing high quality feature extraction methods applied consistently to all samples. This included identifying the best methods of somatic variant calling and RNA-seq analysis. We utilized open challenges to create leaderboards of the best methods submitted by the community. We then participated in the development of open standards to enable the exchange of genomic associations from cancer knowledge bases.

## Methods

### Graph Schema

Gen3 is a data commons management system developed by the Center for Translational Data Science based on their work for the NCI's GDC. The BMEG graph schema is described using a JSON schema derived from Gen3 architecture. JSON Schema is a data definition language for describing rules about data structuring. These rules include required fields, data types and field value

ranges. The Gen3 system extends JSON schema to add concepts to constructing graph data including database ID alias mapping and edge creation.

At the core of Gen3's description of TCGA's metadata, is a tree representing the organization of all the different data elements that make up the program. The tree starts at a top level 'Program' node, representing the entire TCGA program, below that are separate projects for each of the different tumor types. Each tumor type is then populated by a number of Cases, which in turn have multiple Samples, which can then be subdivided into a number of Aliquots. The BMEG schema builds on this base structure to include data from a number of areas including: 1) Genome Reference, 2) Gene and Pathway Annotations, 3) Somatic Variants, 4) Gene Expression data, 5) Knowledge Bases.

## Data Sources

Initial data sources (see [Table 1](#)) for the BMEG were centered on large cohorts of patient-derived samples, with DNA and RNA profiling, cell lines with drug response data and literature-derived drug-phenotype associations. The goal was to provide uniform input data for analysis and machine learning.

### RNA Seq Data

To identify the best methods for RNA analysis, we launched the SMC-RNA challenge, which benchmarked isoform quantification methods to prioritize the methods used for processing data that would be ingested into BMEG. For example, as far as RNA-Seq transcript abundances, we used Kallisto to process the TCGA and CCLE<sup>5</sup> datasets. Additionally the GTEx project<sup>6</sup> provided gene-level transcript-per-million mapped reads (TPM) estimates for normal tissues that could be contrasted with tumors. Combinations of these resources provide 36K vertices to the BMEG graph.

### TCGA Metadata

The Genomic Data Commons (GDC) created a data system to track the clinical and administrative meta-data of the TCGA samples and files. We utilized their web API to obtain TCGA patient and sample metadata for the evidence graph.

### TCGA Genomic Data

To determine the best methods for Somatic mutation calling, we partnered with the DREAM consortium, Sage BioNetworks and OICR to launch the ICGC-TCGA Somatic Mutation Calling challenge<sup>7</sup>. Many of the methods evaluated by this effort were incorporated into pipelines that would then be deployed on the TCGA's 10K exomes as part of the Multi-Center Mutation Calling in Multiple Cancers (MC3) project<sup>8</sup>. The MC3 adds 10K vertices and connects to 3 million alleles (2.6 million distinct) in the graph. For the set of copy number alteration events, we utilized the Gistic2<sup>9</sup> data from the Broad Institute's Firehose system.

### Cell Line Drug Response Data

Drug response data has been collated by the DepMap project<sup>10</sup>. This includes response curves, IC50 and EC50 scores from CCLE<sup>11</sup>, CTRP<sup>12, 13</sup> and GDSC<sup>14</sup>. Additionally, the DepMap meta-data files provided cell line clinical attributes and cross project ID mapping.

### Variant Drug Associations

The Genotype To Phenotype (G2P) schema<sup>15</sup> was designed to enable a number of different cancer knowledge base resources to be aggregated into a coherent resource. With this resource, the BMEG has aggregated associations from six prominent cancer knowledge bases, including 50K associations vertices.

## Pathway Data

Pathway Commons<sup>16</sup> aggregates, normalizes and integrates data from 22 public pathway databases. At 1.5 million interactions and 400K detailed biochemical reactions, it is the largest curated pathway databases available. It aggregates pathway relationships from Reactome<sup>17</sup>, NCI Pathway Interaction Database<sup>18</sup>, PhosphoSitePlus<sup>19</sup>, HumanCyc<sup>20</sup>, PANTHER Pathway<sup>21</sup>, MSigDB<sup>22</sup>, Recon X<sup>23</sup>, Comparative Toxicogenomics Database<sup>24</sup>, KEGG Pathway<sup>25</sup>, Integrating Network Objects with Hierarchies<sup>26</sup>, NetPath<sup>27</sup>, and WikiPathways<sup>28</sup>. All of these resources provided 1.9 million vertices to the graph.

## Reference Data

Biological reference data and existing experimental results form a majority of the data stored in the BMEG. These concepts need to be modeled into the graph, and various transformers written to properly translate these concepts. Part of the import pipeline includes Gene, Transcript and Exon annotations, protein and PFAM<sup>29</sup> assignments as well as Gene Ontology<sup>30</sup> functional annotations. For this reason, the BMEG standardizes on Ensembl IDs<sup>31</sup> as the global identifier for various genomic components.

## Graph Databases and Query Languages

To enable various analytical queries, and provide a framework for building new functionality, we developed the GGraph Integration Platform (GRIP) to power queries against the BMEG web resource. GRIP stores multiple forms of data, with the ability to hold thousands of data elements per vertex and per edge of the graph. As applications need, GRIP allows efficient conversion to various data frames for downstream algorithms. This makes the system not only capable of storing sparse relationship data, such as pathways and ontologies, but also dense matrix formatted data, such as gene expression levels for thousands of genes across hundreds of samples.

The query language implements most operations needed for subgraph selection, as well as aggregation features. A general purpose endpoint places more emphasis on the client side building smart queries to obtain the data they need, rather than having custom server side components provide specialized facets to the users. Because of this, clients can easily create new queries, unanticipated by the server developers, and have them still work. We have made the API available via Python, Javascript and R clients. GRIP is written in the GO programming language, and compiles to a single static binary, which means that it can be installed onto a system with little to no dependencies.

## Results

Every different example use case demonstrates the utility of the BMEG dataset and its query engine. GripQL is a traversal based graph selection language based on Gremlin<sup>32</sup>. The user describes a series of steps that will be undertaken by a 'traveler'. An example traversal would start on a vertex with label 'project', go out to edges labeled 'samples', then go out along edges labeled 'aliquots'. The engine then scans the graph for all valid paths that can be completed given the instructions. Each of the traversal descriptions is based on the graph schema seen in [Figure 1](#). The commands are written using the Python version of the client, but could be executed similarly in R or Javascript. The API provides a **getSchema** method which describes the different types of vertices, their properties and the edges that connect them.

Our analysis begins with counting the mutations per gene in a cancer cohort. As seen in (1), this query starts on a node of a project, in this case *TCGA-BRCA*, and then follows the path to the cases

that belong to the project, then to the samples and finally to the aliquots. As it passes the *Sample* node, it filters for tumor samples. Once on the aliquot node, it continues to the *SomaticCallset*, which represents sets of variants produced by a single mutation calling analysis. The traversal then identifies the edges that connect the *SomaticCallset* to different alleles, this time using the **outE** command to land on the edge, rather than the destination vertex. With the gene ID in hand, we then uses the **aggregate** method to count up the various terms that occur in the *ensembl\_gene* field.

(1)

```
G.query().V("Project:TCGA-BRCA")
.out("cases").out("samples")
.has(gripql.eq("gdc_attributes.sample_type", "Primary Tumor"))
.out("aliquots").out("somatic_callsets").outE("alleles")
.has(gripql.contains("methods", "MUTECT"))
.aggregate(gripql.term("geneCount", "ensembl_gene"))
```

Which returns

```
ENSG00000155657 416
ENSG00000121879 401
ENSG00000141510 300
ENSG00000181143 193
ENSG00000198626 113
```

listing the number of variant alleles found for each gene.

We can then inspect the most frequently impacted pathways. First by identifying which pathways each of the mutated genes belong to in (2) and then by normalizing by the number of genes per pathway in (3). To identify the pathways involved in mutations, we provide a list of all mutated genes, find their associated pathways and retrieve the tuples of every gene-pathway pair, using the **as\_** command (the underscore is added to avoid clashing with the python reserved word **as**) to store the gene and then using the **render** function to display only the data we require.

(2)

```
G.query().V(genes).as_("gene")
.out("pathways").render(["$gene._gid", "$._gid"])
```

Which returns

```
ENSG00000000419 pathwaycommons.org/pc11/Pathway_6bf6d39c0284b6...
ENSG00000000938 identifiers.org/reactome/R-HSA-432142
ENSG00000000971 identifiers.org/reactome/R-HSA-977606
ENSG00000001036 pathwaycommons.org/pc11/Pathway_4b5817426aa06d...
```

listing all of the pathways for which each gene is a member.

This information can be combined with the previous table to calculate the mutations per pathway. To normalize these values we count the number of genes per pathway. The traversal first starts on the *Pathway* vertex marks for later retrieval using the **as\_** command. Once the travel has split and moved out to the multiple child *Gene* vertices, the **select** command recalls the stored pathway vertex and moves the traveler back. As this point, an **aggregation** is called to count the number of travelers on each *Pathway* vertex.

(3)

```
G.query().V().hasLabel("Pathway").as_("pathway")
.out("genes").select("pathway")
.aggregate(gripql.term("pathwayGeneCount", "_gid"))
```

Which returns

|                                                                                                                           |     |
|---------------------------------------------------------------------------------------------------------------------------|-----|
| <a href="https://identifiers.org/reactome/R-HSA-191273">identifiers.org/reactome/R-HSA-191273</a>                         | 439 |
| <a href="https://identifiers.org/reactome/R-HSA-381753">identifiers.org/reactome/R-HSA-381753</a>                         | 393 |
| <a href="https://identifiers.org/reactome/R-HSA-212436">identifiers.org/reactome/R-HSA-212436</a>                         | 341 |
| <a href="https://pathwaycommons.org/pc11/Pathway_4b5817426aa06d...">pathwaycommons.org/pc11/Pathway_4b5817426aa06d...</a> | 340 |

listing the number of mutations for each pathway found.

We can also connect the sets of mutations in the BRCA cohort to the most connected papers, as linked by the G2P associations in (4). In this use case, the aggregate method is called on the special **\_gid** variable which represents a unique Global ID for each vertex.

(4)

```
G.query().V("Project:TCGA-BRCA")
.out("cases").out("samples")
.has(gripql.eq("gdc_attributes.sample_type", "Primary Tumor"))
.out("aliquots").out("somatic_callsets").out("alleles")
.out("g2p_associations").out("publications")
.aggregate(gripql.term("pub", "_gid"))
```

Which returns

|                                                                                                     |      |
|-----------------------------------------------------------------------------------------------------|------|
| <a href="https://pubmed.ncbi.nlm.nih.gov/27269946">Publication:ncbi.nlm.nih.gov/pubmed/27269946</a> | 1033 |
| <a href="https://pubmed.ncbi.nlm.nih.gov/27174596">Publication:ncbi.nlm.nih.gov/pubmed/27174596</a> | 1029 |
| <a href="https://pubmed.ncbi.nlm.nih.gov/19223544">Publication:ncbi.nlm.nih.gov/pubmed/19223544</a> | 858  |
| <a href="https://pubmed.ncbi.nlm.nih.gov/20619739">Publication:ncbi.nlm.nih.gov/pubmed/20619739</a> | 664  |

That lists the number of mutations for all genes connected in each of the returned papers.

The G2P associations also connect to compounds that are linked to phenotypes based on specific alleles in (5). This traversal is much like (4), however it also includes a ***distinct*** operation to identify unique pairs of cases and compounds. If there are multiple known association records from different publications and these publications link one allele to the same drug response phenotype, then only one relationship will be noted per patient.

(5)

```
G.query().V("Project:TCGA-BRCA")
.out("cases").as_("case").out("samples")
.has(gripql.eq("gdc_attributes.sample_type", "Primary Tumor"))
.out("aliquots").out("somatic_callsets").out("alleles")
.out("g2p_associations").out("compounds")
.distinct(["$case._gid", "_gid"])
.aggregate(gripql.term("compound", "_gid"))
```

Which returns

|                                         |     |
|-----------------------------------------|-----|
| <b>Compound:CID104741</b>               | 345 |
| <b>Compound:CID11717001</b>             | 340 |
| <b>Compound:CID56649450</b>             | 327 |
| <b>Compound:NO_ONTOLOGY:CID24989044</b> | 313 |

listing the number of times compounds were associated to mutations in patients.

We can now take the most commonly linked drugs, in a list named *compounds*, that we found in (5) and identify the ones that have also been part of cell line drug response testing in (6). We limit our query to cell lines that were studied as part of the CTRP set of breast cancer cell lines.

(6)

```
G.query().V(compounds).as_("compound").out("projects")
.has(gripql.eq("project_id", "CTRP_Breast_Cancer"))
.select("compound").render(["_gid", "synonym"])
```

Which returns

|                             |               |
|-----------------------------|---------------|
| <b>Compound:CID104741</b>   | FULVESTRANT   |
| <b>Compound:CID11717001</b> | CHEMBL525191  |
| <b>Compound:CID17755052</b> | PICTILISIB    |
| <b>Compound:CID24964624</b> | CHEMBL1079175 |
| <b>Compound:CID42611257</b> | VEMURAFENIB   |
| <b>Compound:CID56649450</b> | ALPELISIB     |

listing those drugs that were profiled in the CTRP effort.

At this point, we find that Compound:CID104741 (Fulvestrant) was on our list of referenced drugs and was studied as part of CTRP. In (7) we look for the EC50 values for the samples in the breast cancer cell lines that were tested against Fulvestrant. This also includes a call to the *render* method which shapes the output into a custom JSON structure. In this case, it forms a tuple with the stored sample ID and EC50 value. The listed of tuples returned by the client can then be passed directly into a Pandas DataFrame<sup>33</sup>.

```
(7)
G.query().V("Program:CTRP").out("projects")
.out("cases").out("samples").as_("sample")
.out("aliquots").out("drug_response").as_("response")
.out("compounds").hasId("Compound:CID104741")
.render(["$sample._gid", "$response.submitter_compound_id", "$response.ec50"])
```

Which returns

|                        |             |              |
|------------------------|-------------|--------------|
| Sample:CTRP:ACH-000937 | fulvestrant | 3.075000e-01 |
| Sample:CTRP:ACH-000076 | fulvestrant | 2.317000e-02 |
| Sample:CTRP:ACH-000983 | fulvestrant | 3.114000e-05 |
| Sample:CTRP:ACH-000045 | fulvestrant | 3.055000e-01 |

listing the EC50 values for each of the BRCA cell lines to the Fulvestrant agent.

With the drug response values in hand, we can then look for associated transcriptomic data. There is no direct RNA sequencing available from the CTRP project, however many of the cell lines used in the CTRP project were assayed as part of the CCLE project. To identify these samples, in (8) we follow the edge connecting the list named *samples* found in (7) to their parent cases. We then follow the *same\_as* edge to identify *Case* vertices in other projects that are the same as the ones we started on, and then follow the tree down to the *GeneExpression* node to obtain the expression values and then link them to our sample IDs. Again, we can use the render function to return properly formatted data structures that can be passed directly into Pandas.

```
(8)
G.query().V(samples).as_("sample")
.out("case").out("same_as")
.out("samples").out("aliquots").out("gene_expressions").as_("exp")
.render(["$sample._gid", "$exp._data.values"])
```

Which returns

Sample:CTRP:A    Sample:CTRP:AC    Sample:CTRP:AC    Sample:CTRP:AC    Sample:CTRP:AC



|                         | CH-000004 | H-000007 | H-000012 | H-000013 | H-000015 |
|-------------------------|-----------|----------|----------|----------|----------|
| <b>ENSG00000000003</b>  | 2.615887  | 4.066089 | 5.820945 | 5.533875 | 4.821200 |
| <b>ENSG00000000005</b>  | 0.000000  | 0.000000 | 0.000000 | 0.056584 | 0.000000 |
| <b>ENSG000000000419</b> | 5.323370  | 5.889960 | 6.006522 | 7.532161 | 6.948484 |

listing the expression values of each gene across cell lines with variants in CTRP and RNA in CCLE. The resulting matrix can be used to develop transcriptome based drug response models.

## Data Releases

The BMEG resource was designed with portability and openness in mind. The graph query engine that runs the system is open source and easy to install, while all of the compiled source files are made available for bulk download. This allows other researchers to build on our existing system, and reuse the data we've collected. Because graph data can be represented by a number of different query engines, we also developed translations of the BMEG resource. Part of the BMEG toolkit is a set of scripts to translate the data set and load it into other graph database systems including Neo4J and Dgraph.

## Discussion

Recently, a number of graph-based data integration projects have appeared, including biograkn<sup>34</sup>, Biograph<sup>35</sup>, Bio4j<sup>36</sup>, Bio2RDF<sup>37</sup>, Hetionet<sup>38</sup>. Many of these systems were built to aggregate pathway and genotype/phenotype linkages. BMEG is unique from these efforts, in that its primary use case is to drive analysis and machine-learning from actual samples. The BMEG holds genomic, transcriptomic and phenotypic data from cancer cases as well as cell line samples. This data is meant to provide a starting point for discovery, and generation of new models, rather than simply a repository of existing models. The core of the BMEG idea is to define a coherent input data set to enable various downstream analysis possibilities.

With the primary layer of data in place, the next step is to enable online machine learning methods and do a comparative analysis of the patterns learned. The next steps, which are currently being developed, will see machine learning based predictions join the graph. These derived associations will connect samples to phenotypes similar to the way that the G2P edges connect samples to drug sensitivity. With these novel phenotypic annotations available, we will be able to observe predicted trends across cohorts and identify new patterns.

## Author Contributions

Conception and design: Josh Stuart, Kyle Ellrott

Collection and assembly of data: Adam Struck, Brian Walsh, Alexander Buchanan, Ryan Spangler

Data analysis and interpretation: Adam Struck, Brian Walsh, Jordan Lee

Manuscript writing: All authors

Final approval of manuscript: All authors

Accountable for all aspects of the work: All authors

# Bibliography

1. Yoon B-H, Kim S-K, Kim S-Y: Use of Graph Database for the Integration of Heterogeneous Biological Data. *Genomics Inform* 15:19–27, 2017
2. Have CT, Jensen LJ: Are graph databases ready for bioinformatics? *Bioinformatics* 29:3107–3108, 2013
3. Lysenko A, Roznovăț IA, Saqi M, et al: Representing and querying disease networks using graph databases. *BioData Min* 9:23, 2016
4. Ugander J, Karrer B, Backstrom L, et al: The Anatomy of the Facebook Social Graph [Internet]. *arXiv [cs.SI]*, 2011 Available from: <http://arxiv.org/abs/1111.4503>
5. Tatlow PJ, Piccolo SR: A cloud-based workflow to quantify transcript-expression levels in public cancer compendia. *Sci Rep* 6:39259, 2016
6. GTEx Consortium: The Genotype-Tissue Expression (GTEx) project. *Nat Genet* 45:580–585, 2013
7. Boutros PC, Ewing AD, Ellrott K, et al: Global optimization of somatic variant identification in cancer genomes with a global community challenge. *Nat Genet* 46:318–319, 2014
8. Ellrott K, Bailey MH, Saksena G, et al: Scalable Open Science Approach for Mutation Calling of Tumor Exomes Using Multiple Genomic Pipelines. *Cell Syst* 6:271–281.e7, 2018
9. Mermel CH, Schumacher SE, Hill B, et al: GISTIC2.0 facilitates sensitive and confident localization of the targets of focal somatic copy-number alteration in human cancers. *Genome Biol* 12:R41, 2011
10. Ghandi M, Huang FW, Jané-Valbuena J, et al: Next-generation characterization of the Cancer Cell Line Encyclopedia. *Nature* 569:503–508, 2019
11. Barretina J, Caponigro G, Stransky N, et al: The Cancer Cell Line Encyclopedia enables predictive

modelling of anticancer drug sensitivity. *Nature* 483:603–607, 2012

**12.** Basu A, Bodycombe NE, Cheah JH, et al: An interactive resource to identify cancer genetic and lineage dependencies targeted by small molecules. *Cell* 154:1151–1161, 2013

**13.** Rees MG, Seashore-Ludlow B, Cheah JH, et al: Correlating chemical sensitivity and basal gene expression reveals mechanism of action. *Nat Chem Biol* 12:109–116, 2016

**14.** Yang W, Soares J, Greninger P, et al: Genomics of Drug Sensitivity in Cancer (GDSC): a resource for therapeutic biomarker discovery in cancer cells. *Nucleic Acids Res* 41:D955–61, 2013

**15.** Wagner AH, Walsh B, Mayfield G, et al: A harmonized meta-knowledgebase of clinical interpretations of cancer genomic variants [Internet]. bioRxiv 366856, 2018[cited 2019 Sep 13] Available from: <https://www.biorxiv.org/content/10.1101/366856v2>

**16.** Cerami EG, Gross BE, Demir E, et al: Pathway Commons, a web resource for biological pathway data. *Nucleic Acids Res* 39:D685–90, 2011

**17.** Fabregat A, Jupe S, Matthews L, et al: The Reactome Pathway Knowledgebase. *Nucleic Acids Res* 46:D649–D655, 2018

**18.** Schaefer CF, Anthony K, Krupa S, et al: PID: the Pathway Interaction Database. *Nucleic Acids Res* 37:D674–9, 2009

**19.** Hornbeck PV, Zhang B, Murray B, et al: PhosphoSitePlus, 2014: mutations, PTMs and recalibrations. *Nucleic Acids Res* 43:D512–20, 2015

**20.** Romero P, Wagg J, Green ML, et al: Computational prediction of human metabolic pathways from the complete human genome. *Genome Biol* 6:R2, 2005

**21.** Mi H, Huang X, Muruganujan A, et al: PANTHER version 11: expanded annotation data from Gene Ontology and Reactome pathways, and data analysis tool enhancements. *Nucleic Acids Res* 45:D183–D189,

2017

**22.** Subramanian A, Tamayo P, Mootha VK, et al: Gene set enrichment analysis: a knowledge-based approach for interpreting genome-wide expression profiles. *Proc Natl Acad Sci U S A* 102:15545–15550, 2005

**23.** Thiele I, Swainston N, Fleming RMT, et al: A community-driven global reconstruction of human metabolism. *Nat Biotechnol* 31:419–425, 2013

**24.** Davis AP, Grondin CJ, Johnson RJ, et al: The Comparative Toxicogenomics Database: update 2017. *Nucleic Acids Res* 45:D972–D978, 2017

**25.** Wrzodek C, Büchel F, Ruff M, et al: Precise generation of systems biology models from KEGG pathways. *BMC Syst Biol* 7:15, 2013

**26.** Yamamoto S, Sakai N, Nakamura H, et al: INOH: ontology-based highly structured database of signal transduction pathways. *Database* 2011:bar052, 2011

**27.** Kandasamy K, Mohan SS, Raju R, et al: NetPath: a public resource of curated signal transduction pathways. *Genome Biol* 11:R3, 2010

**28.** Pico AR, Kelder T, van Iersel MP, et al: WikiPathways: pathway editing for the people. *PLoS Biol* 6:e184, 2008

**29.** Finn RD, Bateman A, Clements J, et al: Pfam: the protein families database. *Nucleic Acids Res* 42:D222–30, 2014

**30.** Carbon S, Mungall C: Gene Ontology Data Archive [Internet], 2018 Available from: <http://dx.doi.org/10.5281/ZENODO.2529950>

**31.** Hubbard T, Barker D, Birney E, et al: The Ensembl genome database project. *Nucleic Acids Res* 30:38–41, 2002

**32.** Rodriguez MA: The Gremlin Graph Traversal Machine and Language [Internet]. arXiv [csDB] ,

2015 Available from: <http://arxiv.org/abs/1508.03843>

33. McKinney W, Others: Data structures for statistical computing in python, in Proceedings of the 9th Python in Science Conference. Austin, TX, 2010, pp 51–56
34. Messina A, Pribadi H, Stichbury J, et al: BioGrakn: A Knowledge Graph-Based Semantic Database for Biomedical Sciences, in Complex, Intelligent, and Software Intensive Systems. Springer International Publishing, 2018, pp 299–309
35. Messina A, Fiannaca A, La Paglia L, et al: BioGraph: a web application and a graph database for querying and analyzing bioinformatics resources. BMC Syst Biol 12:98, 2018
36. Pareja-Tobes P, Tobes R, Manrique M, et al: Bio4j: a high-performance cloud-enabled graph-based data platform [Internet]. bioRxiv 016758, 2015[cited 2019 Sep 13] Available from: <https://www.biorxiv.org/content/10.1101/016758v1>
37. Belleau F, Nolin M-A, Tourigny N, et al: Bio2RDF: towards a mashup to build bioinformatics knowledge systems. J Biomed Inform 41:706–716, 2008
38. Himmelstein DS, Lizee A, Hessler C, et al: Systematic integration of biomedical knowledge prioritizes drugs for repurposing [Internet]. Elife 6, 2017 Available from: <http://dx.doi.org/10.7554/eLife.26726>
39. Flicek P, Amode MR, Barrell D, et al: Ensembl 2011. Nucleic Acids Res 39:D800–6, 2011
40. Ashburner M, Ball CA, Blake JA, et al: Gene ontology: tool for the unification of biology. The Gene Ontology Consortium. Nat Genet 25:25–29, 2000
41. Mungall CJ, McMurry JA, Köhler S, et al: The Monarch Initiative: an integrative data and analytic platform connecting phenotypes to genotypes across species. Nucleic Acids Res 45:D712–D722, 2017
42. Liberzon A, Subramanian A, Pinchback R, et al: Molecular signatures database (MSigDB) 3.0. Bioinformatics 27:1739–1740, 2011

- 43.** El-Gebali S, Mistry J, Bateman A, et al: The Pfam protein families database in 2019. *Nucleic Acids Res* 47:D427–D432, 2019
- 44.** Kim S, Thiessen PA, Bolton EE, et al: PubChem Substance and Compound databases. *Nucleic Acids Res* 44:D1202–13, 2016
- 45.** Cotto KC, Wagner AH, Feng Y-Y, et al: DGIdb 3.0: a redesign and expansion of the drug-gene interaction database. *Nucleic Acids Res* 46:D1068–D1073, 2018
- 46.** Edwards AM, Isserlin R, Bader GD, et al: Too many roads not taken. *Nature* 470:163–165, 2011
- 47.** Bento AP, Gaulton A, Hersey A, et al: The ChEMBL bioactivity database: an update. *Nucleic Acids Res* 42:D1083–90, 2014
- 48.** Ainscough BJ, Griffith M, Coffman AC, et al: DoCM: a database of curated mutations in cancer. *Nat Methods* 13:806–807, 2016
- 49.** Pawson AJ, Sharman JL, Benson HE, et al: The IUPHAR/BPS Guide to PHARMACOLOGY: an expert-driven knowledgebase of drug targets and their ligands. *Nucleic Acids Res* 42:D1098–106, 2014
- 50.** Simon GR, Somaiah N: A tabulated summary of targeted and biologic therapies for non-small-cell lung cancer. *Clin Lung Cancer* 15:21–51, 2014
- 51.** Rask-Andersen M, Masuram S, Schiöth HB: The druggable genome: Evaluation of drug targets in clinical trials suggests major shifts in molecular class and indication. *Annu Rev Pharmacol Toxicol* 54:9–26, 2014
- 52.** Rask-Andersen M, Almén MS, Schiöth HB: Trends in the exploitation of novel drug targets. *Nat Rev Drug Discov* 10:579–590, 2011
- 53.** Zhu F, Han B, Kumar P, et al: Update of TTD: Therapeutic Target Database. *Nucleic Acids Res* 38:D787–91, 2010

## Figure Legends

Figure 1: Graph Schema. The vertex types and connections of the BMEG. The numbers represent the count for each vertex type, and the counts on the edges represent the total number of connections between those two vertex types.

Figure 2: BMEG Architecture. High Level architecture diagram of the BMEG. A) represents the Extract Transform Load (ETL) processes that are used to build the graph, B) the database and query engine used to power the `bmeg.io` site, C) the different client site options for communicating with the system, D) Other graph engines that can be used with the BMEGexport code to move the BMEG data to other graph databases.

Figure 3: Example Queries. A diagram showing how each of the different queries described in this paper traverse the graph. Each separate query is labeled by the equation number in the text.

Table 1: BMEG Data Sources. The different data sources, and their license, that are used to build the BMEG.



Table 1)

| Resource         | Description                                                                                                                                                                                                                                               | Contains Resource | License                                                                                                                               | References |
|------------------|-----------------------------------------------------------------------------------------------------------------------------------------------------------------------------------------------------------------------------------------------------------|-------------------|---------------------------------------------------------------------------------------------------------------------------------------|------------|
| TCGA             | The Cancer Genome Atlas (TCGA) profiles the DNA, RNA, protein, and epigenetic levels of over 10,000 individuals across 33 cancer types.                                                                                                                   | --                |                                                                                                                                       |            |
| MC3              | The Cancer Genome Atlas (TCGA) cancer genomics dataset includes over 10,000 tumor-normal exome pairs across 33 different cancer types, in total >400 TB of raw data files requiring analysis.                                                             | --                |                                                                                                                                       | 8          |
| GTE <sub>x</sub> | The Genotype-Tissue Expression (GTE <sub>x</sub> ) project.                                                                                                                                                                                               | --                |                                                                                                                                       | 6          |
| CCLE             | The Cancer Cell Line Encyclopedia (CCLE): gene expression, chromosomal copy number and massively parallel sequencing data from 947 human cancer cell lines.                                                                                               | --                | <a href="https://depmap.org/portal/ccle/terms_and_conditions">https://depmap.org/portal/ccle/terms_and_conditions</a>                 | 11         |
| CTRP             | Cancer Therapeutics Response Portal (CTRP) catalogues response profiles of 481 compounds against 860 cancer cell lines.                                                                                                                                   | --                | <a href="https://ocg.cancer.gov/programs/ctd2/using-ctd2-data">https://ocg.cancer.gov/programs/ctd2/using-ctd2-data</a>               | 12         |
| GDSC             | The Genomics of Drug Sensitivity in Cancer (GDSC) database contains drug sensitivity data for almost 75 000 experiments, describing response to 138 anticancer drugs across almost 700 cancer cell lines.                                                 | --                | CC BY-NC-ND 2.5                                                                                                                       | 14         |
| Ensembl          | The Ensembl project has been aggregating, processing, integrating and redistributing genomic datasets since the initial release of the draft human genome, with the aim of accelerating genomics research through rapid open distribution of public data. | --                | <a href="https://uswest.ensembl.org/info/about/legal/disclaimer.html">https://uswest.ensembl.org/info/about/legal/disclaimer.html</a> | 39         |
| GO               | Gene Ontology Consortium is a controlled vocabulary describing knowledge of gene and protein roles in cells.                                                                                                                                              | --                | CC BY 4.0                                                                                                                             | 40         |
| MonDO            | The Monarch Disease Ontology merges in multiple disease resources to yield a coherent ontology.                                                                                                                                                           | --                | CC BY 3.0                                                                                                                             | 41         |
| MSigDB           | The Molecular Signatures Database is a collection of annotated gene sets.                                                                                                                                                                                 | --                | CC BY 4.0                                                                                                                             | 42         |
| PFAM             | Pfam is a database of protein                                                                                                                                                                                                                             | --                | CC0                                                                                                                                   | 43         |

|                 |                                                                                                                                                                                                                                   |                                |                                                                                                                                                         |                                                                                                         |
|-----------------|-----------------------------------------------------------------------------------------------------------------------------------------------------------------------------------------------------------------------------------|--------------------------------|---------------------------------------------------------------------------------------------------------------------------------------------------------|---------------------------------------------------------------------------------------------------------|
|                 | families and annotations.                                                                                                                                                                                                         |                                |                                                                                                                                                         |                                                                                                         |
| PubChem         | PubChem is a public repository containing information about chemical substances and their biological activities.                                                                                                                  | --                             |                                                                                                                                                         | 44                                                                                                      |
| PubMed          | PubMed is an archive of biomedical and life sciences journal literature.                                                                                                                                                          | --                             | <a href="https://www.nlm.nih.gov/databases/download/terms_and_conditions.html">https://www.nlm.nih.gov/databases/download/terms_and_conditions.html</a> |                                                                                                         |
| VICC G2P        | The VICC G2P is a framework for aggregating and harmonizing variant interpretations to produce a meta-knowledgebase of 12,856 aggregate interpretations covering 3,437 unique variants in 415 genes, 357 diseases, and 791 drugs. | --                             | --                                                                                                                                                      | 15                                                                                                      |
|                 |                                                                                                                                                                                                                                   | CGI                            | CC0                                                                                                                                                     |                                                                                                         |
|                 |                                                                                                                                                                                                                                   | CIViC                          | CC0                                                                                                                                                     |                                                                                                         |
|                 |                                                                                                                                                                                                                                   | JaxCKB                         | CC BY-NC-SA 4.0                                                                                                                                         |                                                                                                         |
|                 |                                                                                                                                                                                                                                   | MolecularMatch                 | <a href="https://www.molecularmatch.com/terms/">https://www.molecularmatch.com/terms/</a>                                                               |                                                                                                         |
|                 |                                                                                                                                                                                                                                   | OncoKB                         | <a href="https://oncokb.org/terms">https://oncokb.org/terms</a>                                                                                         |                                                                                                         |
|                 |                                                                                                                                                                                                                                   | PMKB                           | CC BY 4.0                                                                                                                                               |                                                                                                         |
| Pathway Commons | Pathway Commons integrates public pathway and interaction databases.                                                                                                                                                              | --                             | --                                                                                                                                                      | 16                                                                                                      |
|                 |                                                                                                                                                                                                                                   | CTD                            | <a href="http://ctdbase.org/about/legal.jsp">http://ctdbase.org/about/legal.jsp</a>                                                                     | 24                                                                                                      |
|                 |                                                                                                                                                                                                                                   | HumanCyc                       | SRI                                                                                                                                                     | <a href="https://www.ncbi.nlm.nih.gov/pubmed/15642094">https://www.ncbi.nlm.nih.gov/pubmed/15642094</a> |
|                 |                                                                                                                                                                                                                                   | INOH                           | CC BY-SA                                                                                                                                                | 26                                                                                                      |
|                 |                                                                                                                                                                                                                                   | KEGG Pathway                   |                                                                                                                                                         | 25                                                                                                      |
|                 |                                                                                                                                                                                                                                   | NetPath                        | CC0                                                                                                                                                     | 27                                                                                                      |
|                 |                                                                                                                                                                                                                                   | Panther                        | GNU GPL V2                                                                                                                                              | 21                                                                                                      |
|                 |                                                                                                                                                                                                                                   | PhosphositePlus                | CC BY-NC-SA 3.0                                                                                                                                         | 19                                                                                                      |
|                 |                                                                                                                                                                                                                                   | Protein Interaction Database   |                                                                                                                                                         | 18                                                                                                      |
|                 |                                                                                                                                                                                                                                   | Reactome                       | CC0                                                                                                                                                     | 17                                                                                                      |
|                 |                                                                                                                                                                                                                                   | Recon X                        | CC BY-NC 2.0                                                                                                                                            | 23                                                                                                      |
|                 |                                                                                                                                                                                                                                   | WikiPathways                   | CC0                                                                                                                                                     | 28                                                                                                      |
| DGIDB           | The Drug Gene Interaction Database integrates public interaction databases.                                                                                                                                                       | --                             | --                                                                                                                                                      | 45                                                                                                      |
|                 |                                                                                                                                                                                                                                   | CancerCommons                  |                                                                                                                                                         | 46                                                                                                      |
|                 |                                                                                                                                                                                                                                   | ChEMBL Interactions            | CC BY-SA 3.0                                                                                                                                            | 47                                                                                                      |
|                 |                                                                                                                                                                                                                                   | Clarity Foundation: Biomarkers |                                                                                                                                                         |                                                                                                         |
|                 |                                                                                                                                                                                                                                   | Clarity                        |                                                                                                                                                         |                                                                                                         |

|  |  |                                            |                                                                                                                                                           |    |
|--|--|--------------------------------------------|-----------------------------------------------------------------------------------------------------------------------------------------------------------|----|
|  |  | Foundation:<br>Clinical Trials             |                                                                                                                                                           |    |
|  |  | DoCM                                       | CC BY 4.0                                                                                                                                                 | 48 |
|  |  | FDA<br>Biomarkers                          |                                                                                                                                                           |    |
|  |  | Guide to<br>Pharmacolog<br>y: Interactions |                                                                                                                                                           | 49 |
|  |  | My Cancer<br>Genome                        | <a href="https://www.mycancergenome.org/content/page/legal-policies-licensing/">https://www.mycancergenome.org/content/page/legal-policies-licensing/</a> |    |
|  |  | NCI Cancer<br>Gene Index                   |                                                                                                                                                           |    |
|  |  | TALC                                       |                                                                                                                                                           | 50 |
|  |  | TDG Clinical<br>Trials                     |                                                                                                                                                           | 51 |
|  |  | TEND                                       |                                                                                                                                                           | 52 |
|  |  | TTD                                        |                                                                                                                                                           | 53 |

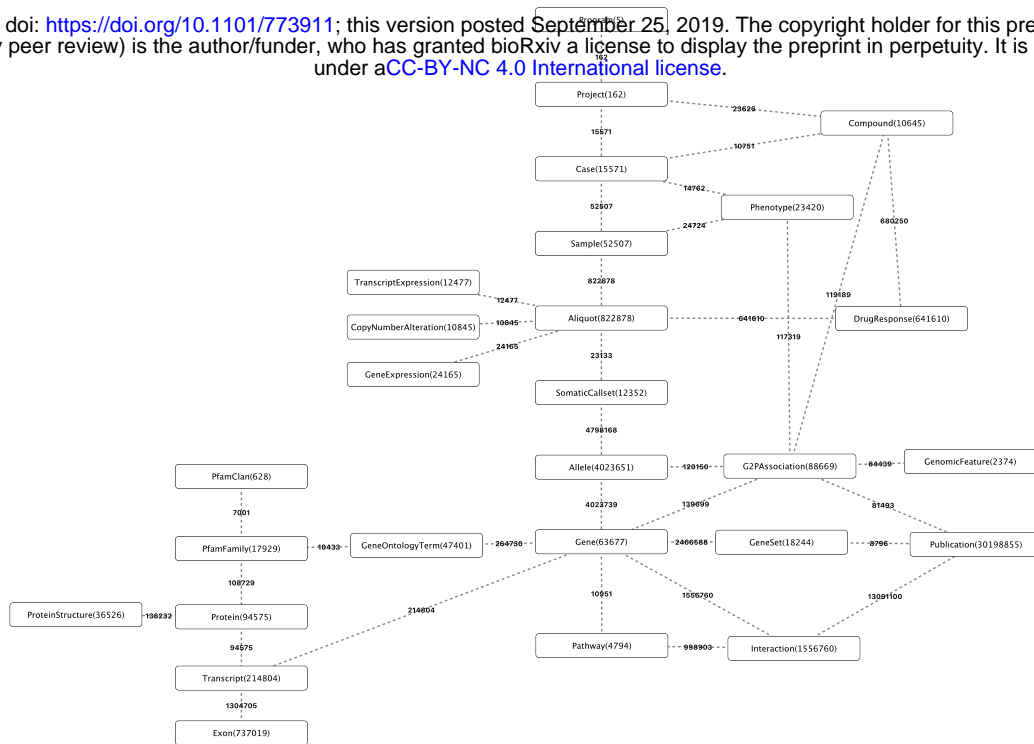

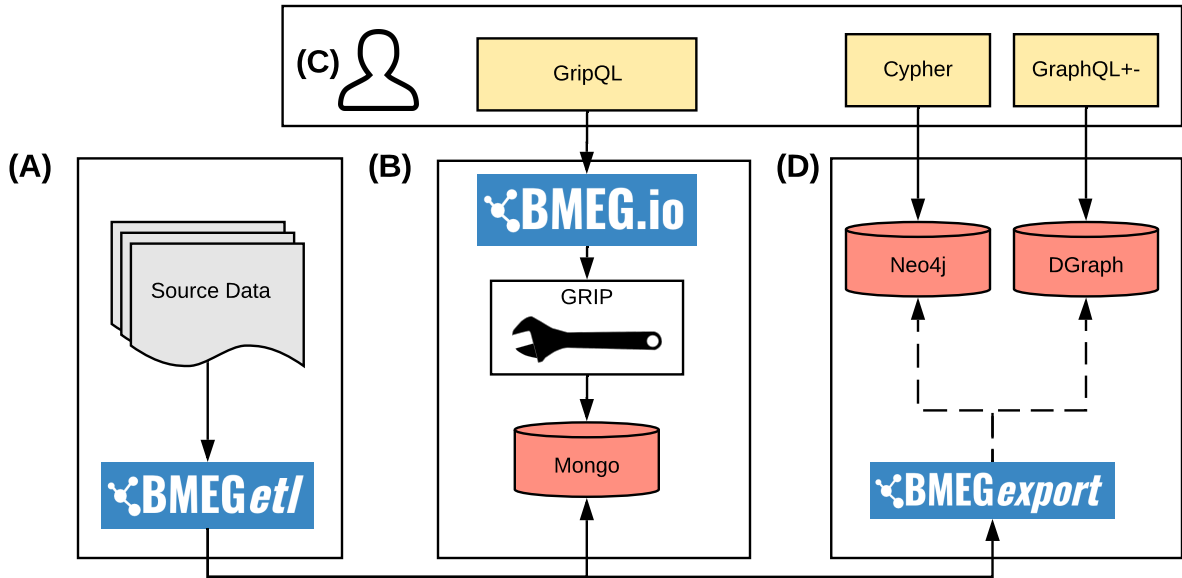

bioRxiv preprint doi: <https://doi.org/10.1101/773911>; this version posted September 25, 2019. The copyright holder for this preprint (which was not certified by peer review) is the author/funder, who has granted bioRxiv a license to display the preprint in perpetuity. It is made available under aCC-BY-NC 4.0 International license.

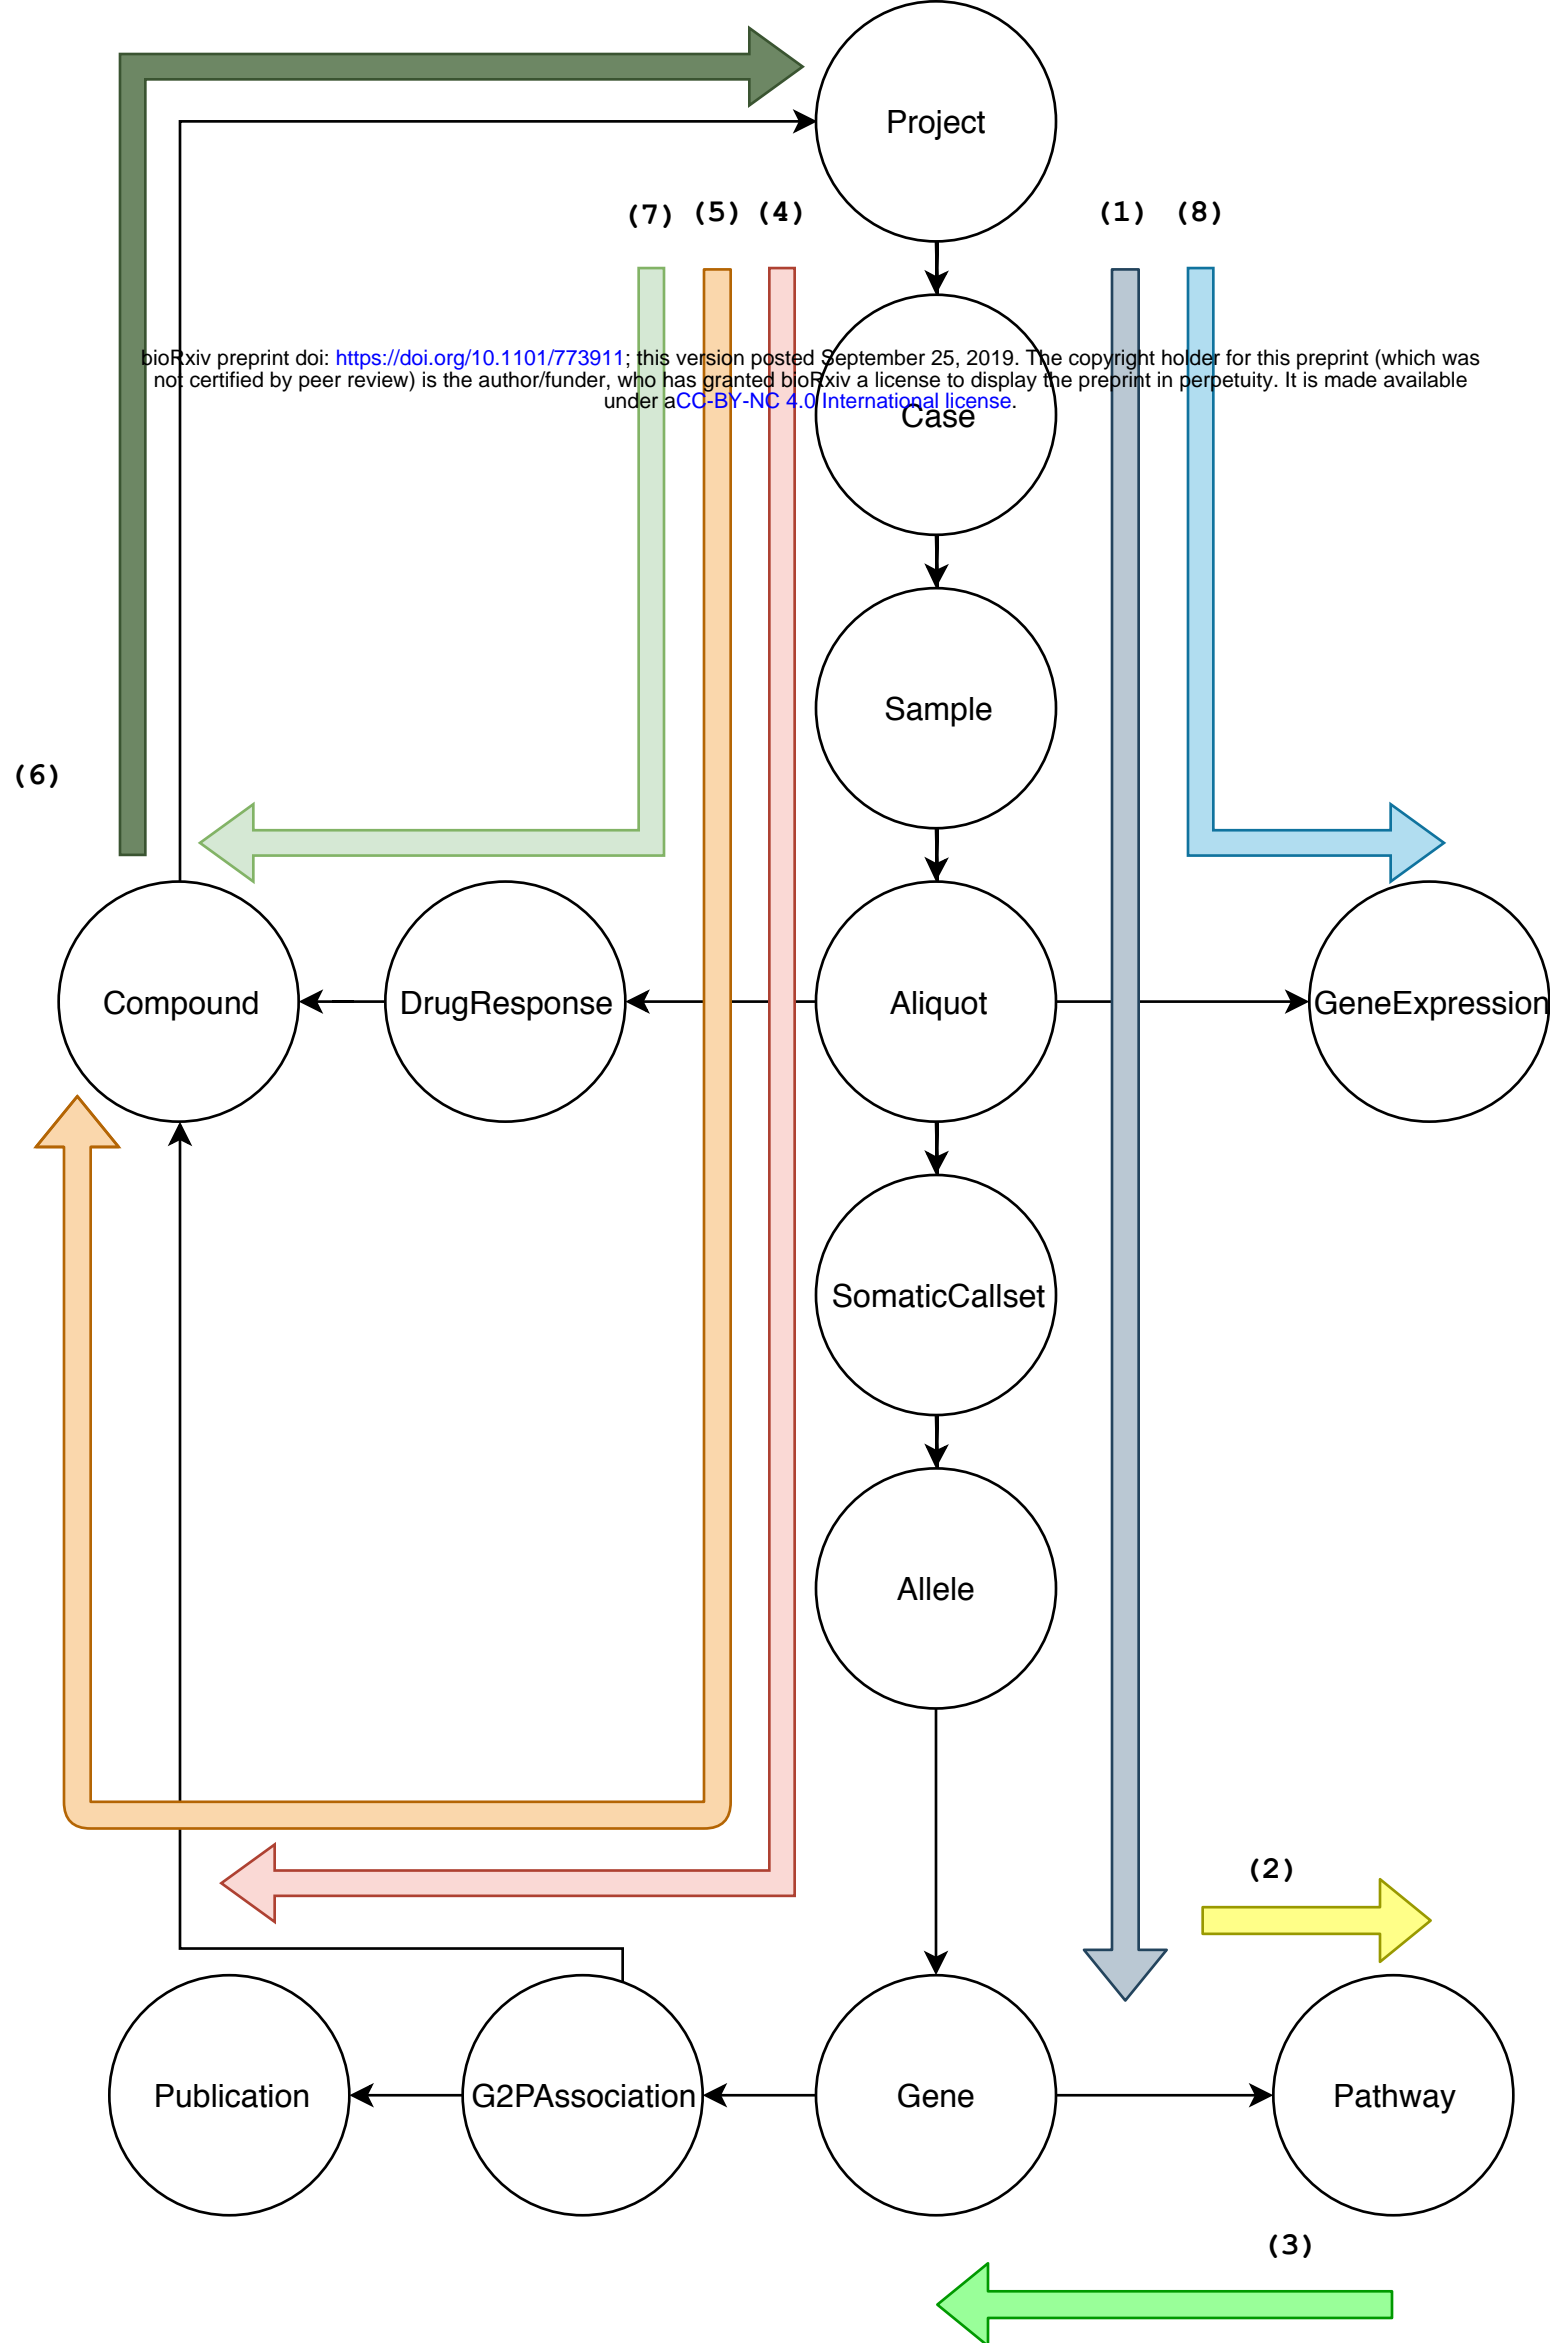

Source: http://biorxiv.org/content/10.1101/773911v1.full.pdf
